# Supplementary figures and images for: Suppression of Fear Memory Reinstatement by 3,6′-Disinapoyl Sucrose
Source: Research Square preprint supplement (doi:10.21203/rs.3.rs-7737464/v1), 2025-11-18

p-CREB

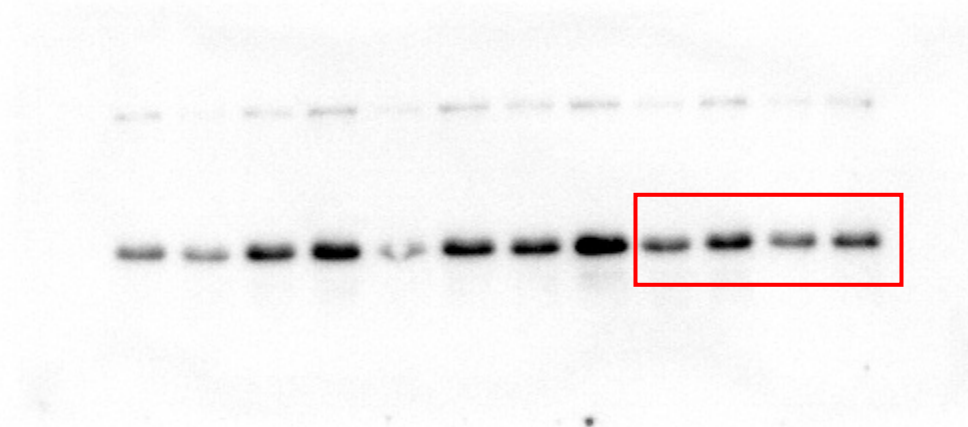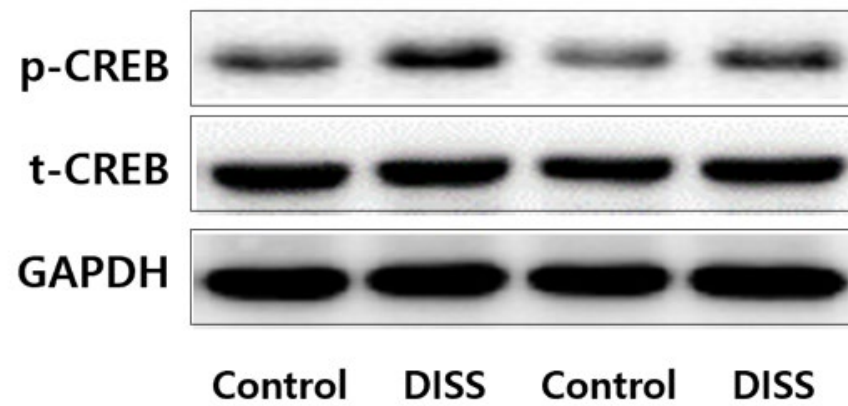

t-CREB

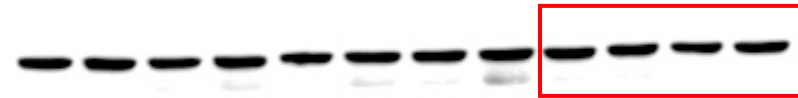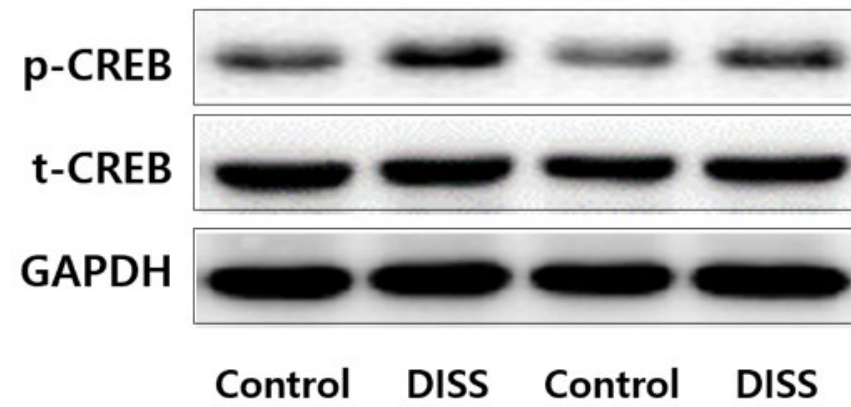

GAPDH

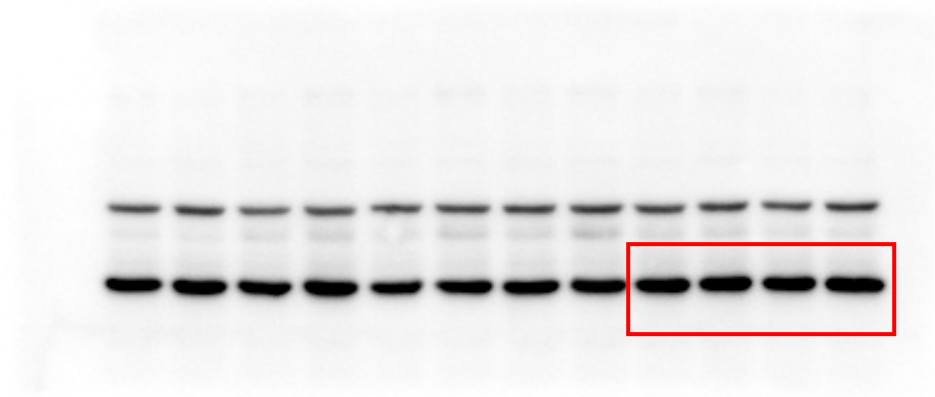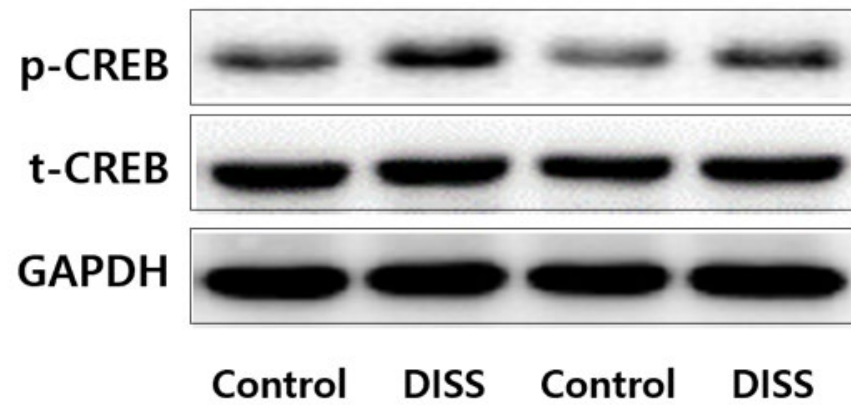

GR

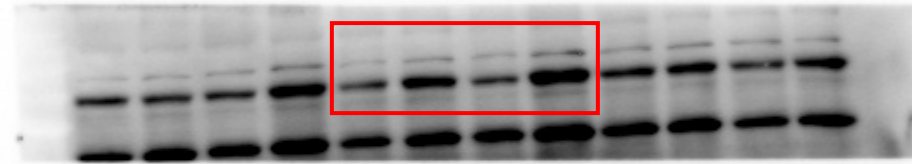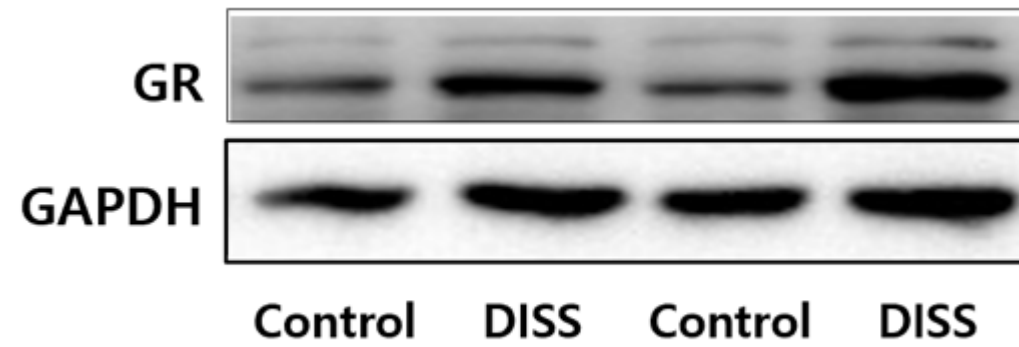

GAPDH

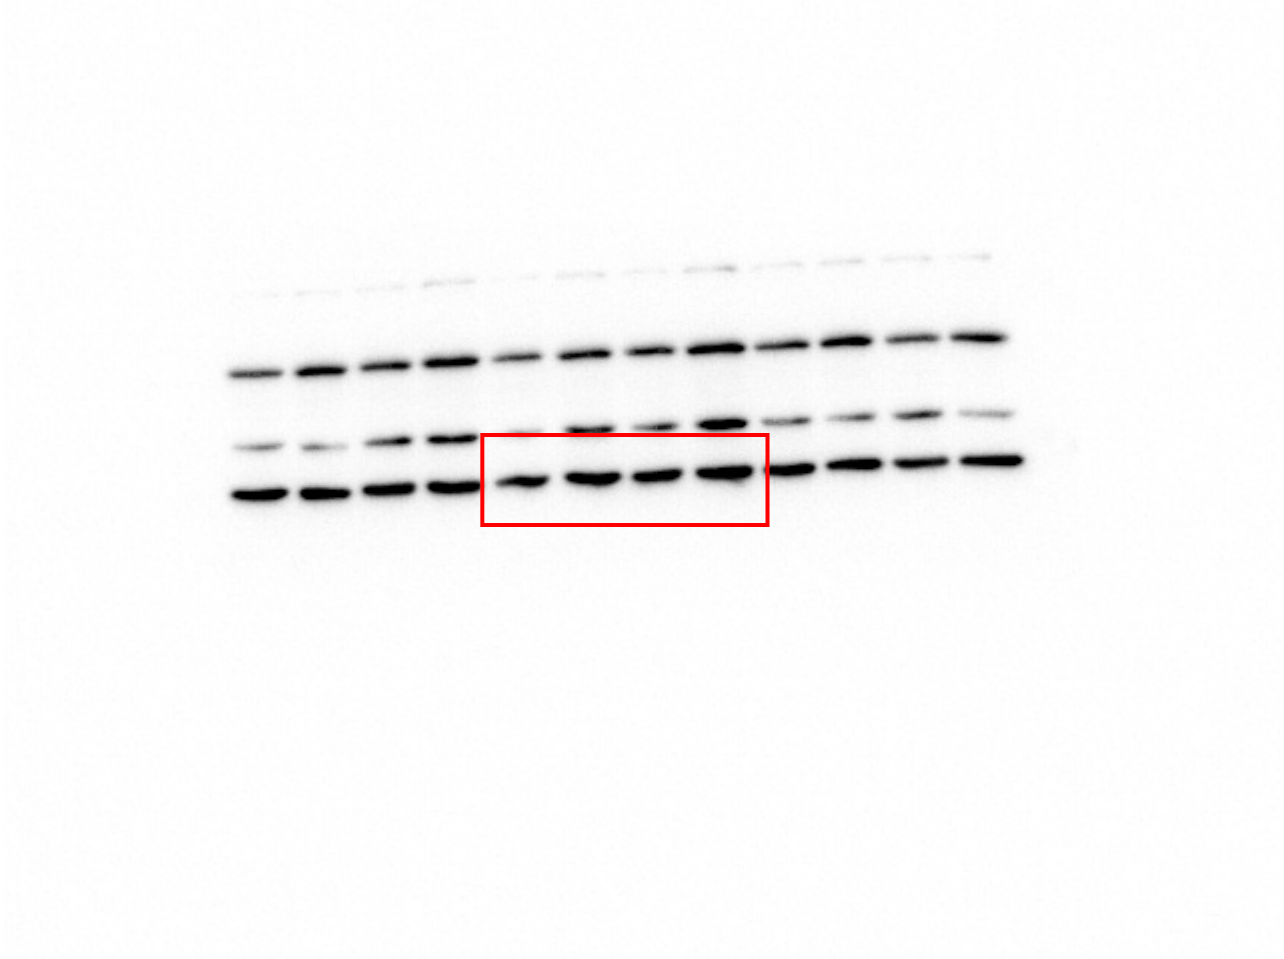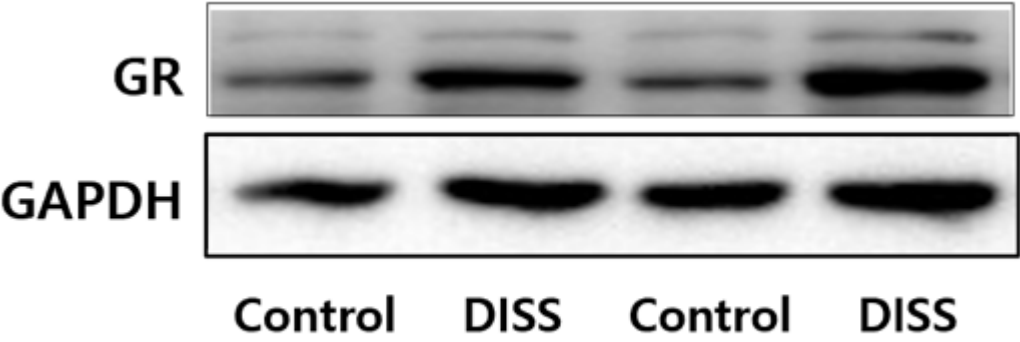

NFkB

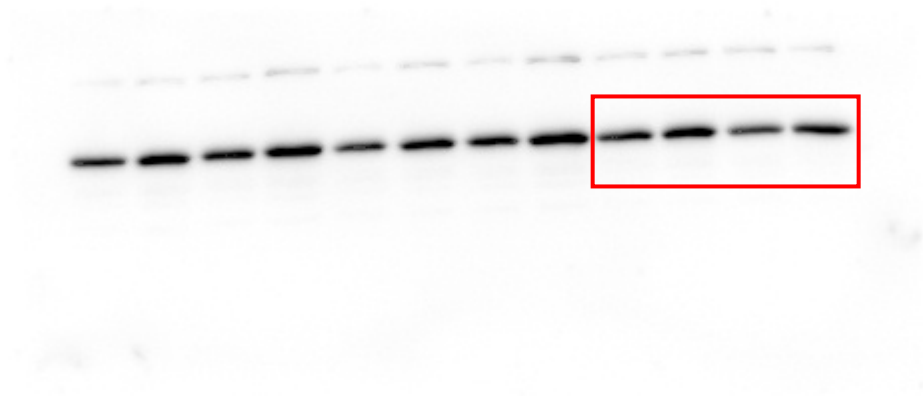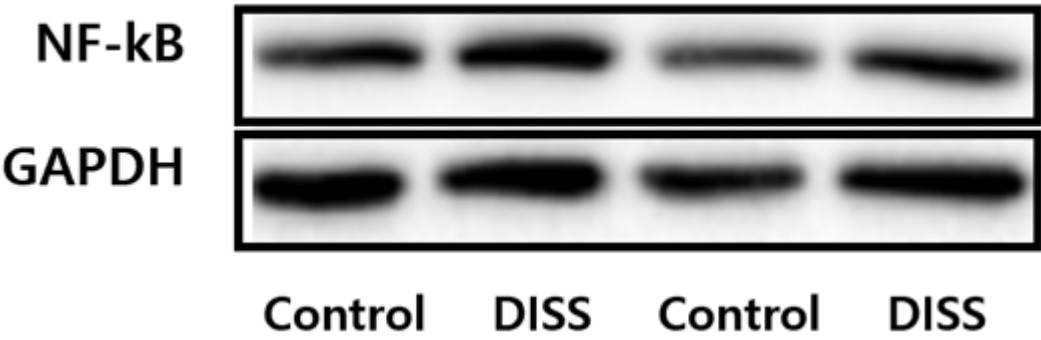

GAPDH

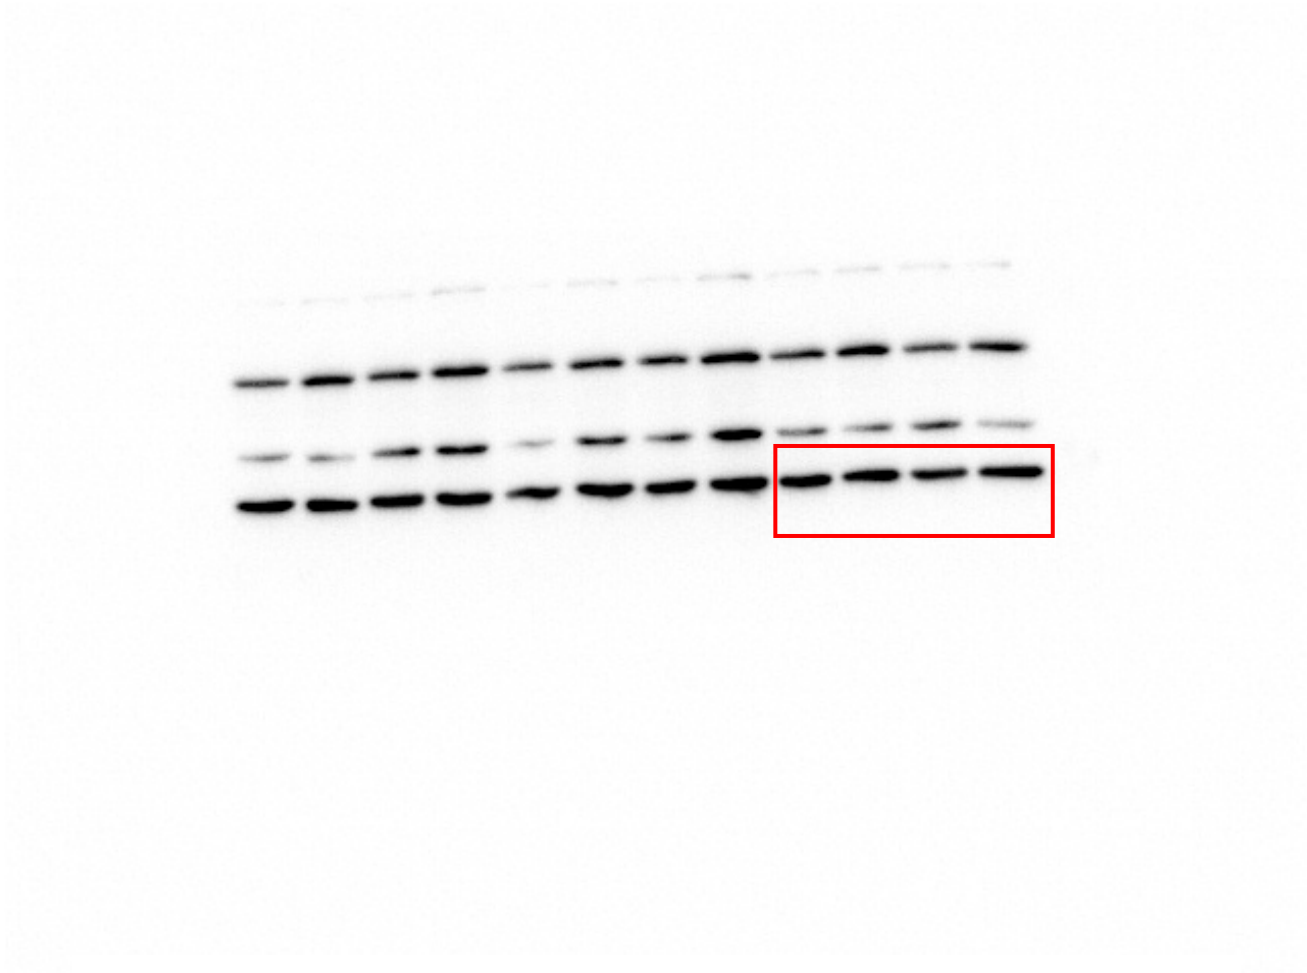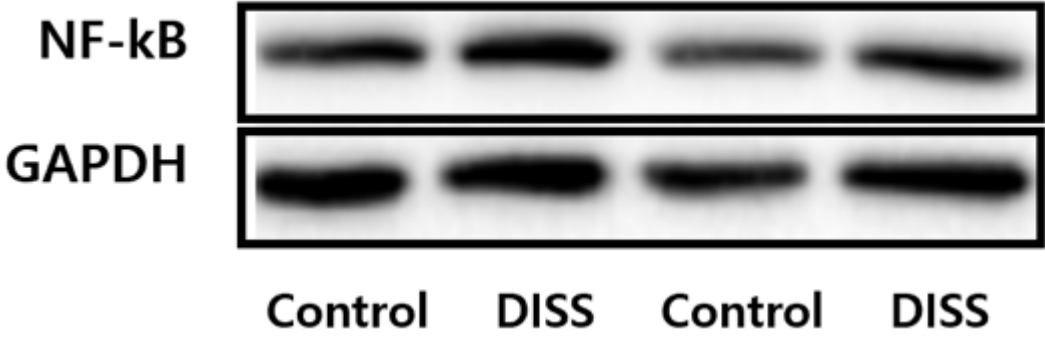

Supplement: Supplementary file 1 [file 782fb8bbc0c2a34b97399339.pdf]
